# Supplementary material for: High-mobility two-dimensional electron gas in SrGeO3- and BaSnO3-based perovskite oxide heterostructures: an ab initio study
Source: Royal Society of Chemistry journal article supplement (doi:10.1039/c6cp05572a), 2016-01-01
Supplement: c6cp05572a1.pdf [file c6cp05572a1.pdf]

## Supporting Information

### **High-Mobility Two-Dimensional Electron Gas in SrGeO<sub>3</sub>- and BaSnO<sub>3</sub>-Based Perovskite Oxide Heterostructures: *Ab-initio* Study**

Yaqin Wang,<sup>a, b</sup> Wu Tang,<sup>a</sup> Jianli Cheng,<sup>b</sup> Safdar Nazir,<sup>b</sup> and Kesong Yang<sup>\*b</sup>

<sup>a</sup>*State Key Laboratory of Electronic Thin Films and Integrated Devices, University of Electronic Science and Technology of China, Chengdu 610054, P. R. China.*

<sup>b</sup>*Department of NanoEngineering, University of California, San Diego, 9500 Gilman Drive, La Jolla, California, 92093-0448, United States*

\*E-mail: [kesong@ucsd.edu](mailto:kesong@ucsd.edu). Tel: +1-858-534-2514.

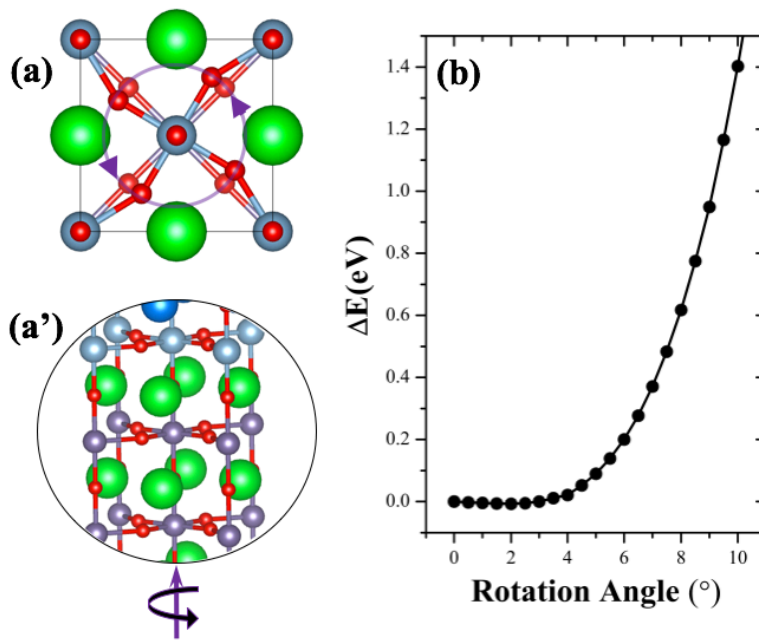

**Figure S1.** Scheme of LaAlO<sub>3</sub>/SrGeO<sub>3</sub> heterostructure with GeO<sub>6</sub> and AlO<sub>6</sub> rotations from (a) top view and (a') side view, and (b) calculated total energy difference  $\Delta E$  as a function of the rotation angle.  $\Delta E$  is calculated relative to the total energy of non-rotated structure. All AlO<sub>6</sub> cages in the film and two GeO<sub>6</sub> cages near the interface are rotated.
